# Supplementary material
Source: PubMed Central journal article supplement (PMC6105861)
Supplement: zac008187354s1.pdf [file zac008187354s1.pdf]

**Table S1** Statistical analysis of the killing activity of imipenem (IPM) and rifabutin (RFB) against *M. abscessus* CIP104536S

|               |     | <i>P</i> value for the indicated comparison (Mann-Whitney U test) |        |        |        |              |               |
|---------------|-----|-------------------------------------------------------------------|--------|--------|--------|--------------|---------------|
|               |     | ss Atb                                                            | IPM 8  | IPM 32 | RFB 16 | IPM 8 RFB 16 | IPM 32 RFB 16 |
|               |     | 9.7                                                               | 4.3    | 4.5    | 6.1    | 3.7          | 4.7           |
| ss Atb        | 9.7 | NA                                                                | 0.0262 | 0.0262 | 0.0262 | 0.0262       | 0.0262        |
| IPM 8         | 4.3 |                                                                   | NA     | 0.0339 | 0.0262 | 0.0253       | 0.4867        |
| IPM 32        | 4.5 |                                                                   |        | NA     | 0.0308 | 0.0339       | 0.8248        |
| RFB 16        | 6.1 |                                                                   |        |        | NA     | 0.0262       | 0.0323        |
| IPM 8 RFB 16  | 3.7 |                                                                   |        |        |        | NA           | 0.0369        |
| IPM 32 RFB 16 | 4.7 |                                                                   |        |        |        |              | NA            |

Log<sub>10</sub> cfu/ml after 72h of incubation in the presence of the drugs (µg/ml) are indicated. NA, not applicable.

**Table S2** Statistical analysis of the killing activity of imipenem (IPM) and rifabutin (RFB) against *M. abscessus* Δbla<sub>Mab</sub>

|             |     | <i>P</i> value for the indicated comparison (Mann-Whitney U test) |        |        |        |            |             |
|-------------|-----|-------------------------------------------------------------------|--------|--------|--------|------------|-------------|
|             |     | ss Atb                                                            | IPM 8  | IPM 32 | RFB 16 | IPM8 RFB16 | IPM32 RFB16 |
|             |     | 9.2                                                               | 4.0    | 4.7    | 5.5    | 4.1        | 4.1         |
| ss Atb      | 9.2 | N.A                                                               | 0.0025 | 0.016  | 0.0017 | 0.0025     | 0.0157      |
| IPM 8       | 4.0 |                                                                   | N.A    | 0.5962 | 0.0025 | 0.2539     | 0.4308      |
| IPM 32      | 4.7 |                                                                   |        | N.A    | 0.0384 | 0.7928     | 0.0463      |
| RFB 16      | 5.5 |                                                                   |        |        | N.A    | 0.0027     | 0.0157      |
| IPM8 RFB16  | 4.1 |                                                                   |        |        |        | N.A        | 0.4288      |
| IPM32 RFB16 | 4.1 |                                                                   |        |        |        |            | N.A         |

Log<sub>10</sub> cfu/ml after 72h of incubation in the presence of the drugs (µg/ml) are indicated. NA, not applicable.

**Table S3** Statistical analysis of the killing activity of imipenem (IPM) and rifabutin (RFB) alone or in combination with avibactam (AVI) against *M. abscessus* CIP104536S

|                    |     | <i>P</i> value for the indicated comparison (Mann-Whitney U test) |        |        |              |             |                    |
|--------------------|-----|-------------------------------------------------------------------|--------|--------|--------------|-------------|--------------------|
|                    |     | ss Atb                                                            | IPM 8  | RFB 16 | IPM 8 RFB 16 | IPM 8 AVI 4 | IPM 8 RFB 16 AVI 4 |
|                    |     | 9.6                                                               | 5.4    | 6.0    | 4.7          | 4.8         | 5.3                |
| ss Atb             | 9.6 | NA                                                                | 0.0463 | 0.0463 | 0.0463       | 0.0463      | 0.0463             |
| IPM 8              | 5.4 |                                                                   | NA     | 0.0431 | 0.0431       | 0.0431      | 0.0431             |
| RFB 16             | 6.0 |                                                                   |        | NA     | 0.0431       | 0.0431      | 0.0431             |
| IPM 8 RFB 16       | 4.7 |                                                                   |        |        | NA           | 0.0431      | 0.0431             |
| IPM 8 AVI 4        | 4.8 |                                                                   |        |        |              | NA          | 0.0431             |
| IPM 8 RFB 16 AVI 4 | 5.3 |                                                                   |        |        |              |             | NA                 |

Log<sub>10</sub> cfu/ml after 72h of incubation in the presence of the drugs (µg/ml) are indicated. NA, not applicable.

**Table S4** Statistical analysis of the intracellular activity of imipenem (IPM) and rifabutin (RFB) against *M. abscessus* CIP104536S

|               |      | <i>P</i> value for the indicated comparison (Mann-Whitney U test) |        |        |        |              |               |
|---------------|------|-------------------------------------------------------------------|--------|--------|--------|--------------|---------------|
|               |      | ss Atb                                                            | IPM 8  | IPM 32 | RFB 16 | IPM 8 RFB 16 | IPM 32 RFB 16 |
|               |      | 134                                                               | 1.7    | 0.44   | 6.1    | 0.22         | 0.01          |
| ss Atb        | 134  | NA                                                                | 0.0495 | 0.0495 | 0.0495 | 0.0495       | 0.0495        |
| IPM 8         | 1.7  |                                                                   | NA     | 0.0495 | 0.0389 | 0.0495       | 0.0495        |
| IPM 32        | 0.44 |                                                                   |        | NA     | 0.0495 | 0.0495       | 0.0495        |
| RFB 16        | 6.1  |                                                                   |        |        | NA     | 0.0495       | 0.0495        |
| IPM 8 RFB 16  | 0.22 |                                                                   |        |        |        | NA           | 0.0495        |
| IPM 32 RFB 16 | 0.01 |                                                                   |        |        |        |              | NA            |

Fold change in the number of intracellular bacteria after 72h of incubation in the presence of the drugs (µg/ml) are indicated. NA, not applicable.

**Table S5** Statistical analysis of the intracellular activity of imipenem (IPM) and rifabutin (RFB) against *M. abscessus*  $\Delta bla_{Mab}$ 

|               |       | P value for the indicated comparison (Mann-Whitney U test) |        |        |        |              |               |
|---------------|-------|------------------------------------------------------------|--------|--------|--------|--------------|---------------|
|               |       | ss Atb                                                     | IPM 8  | IPM 32 | RFB 16 | IPM 8 RFB 16 | IPM 32 RFB 16 |
|               |       | 233.5                                                      | 0.39   | 0.17   | 3.65   | 0.065        | 0.019         |
| ss Atb        | 233.5 | NA                                                         | 0.0495 | 0.0495 | 0.0495 | 0.0495       | 0.0495        |
| IPM 8         | 0.39  |                                                            | NA     | 0.0763 | 0.0201 | 0.0495       | 0.0495        |
| IPM 32        | 0.17  |                                                            |        | NA     | 0.0495 | 0.0495       | 0.0495        |
| RFB 16        | 3.65  |                                                            |        |        | NA     | 0.0495       | 0.0495        |
| IPM 8 RFB 16  | 0.065 |                                                            |        |        |        | NA           | 0.5127        |
| IPM 32 RFB 16 | 0.019 |                                                            |        |        |        |              | NA            |

Fold change in the number of intracellular bacteria after 72h of incubation in the presence of the drugs ( $\mu\text{g/ml}$ ) are indicated. NA, not applicable.

**Table S6** Statistical analysis of the intracellular activity of imipenem (IPM) and rifabutin (RFB) alone or in combination with avibactam (AVI) against *M. abscessus* CIP104536S

|                    |      | P value for the indicated comparison (Mann-Whitney U test) |        |        |        |             |           |              |                    |                    |
|--------------------|------|------------------------------------------------------------|--------|--------|--------|-------------|-----------|--------------|--------------------|--------------------|
|                    |      | ss Atb                                                     | IPM 8  | RFB 1  | RFB 8  | IPM 8 RFB 1 | IPM8 RFB8 | IPM 8 AVI 16 | IPM 8 RFB 1 AVI 16 | IPM 8 RFB 8 AVI 16 |
|                    |      | 125                                                        | 1.23   | 7.48   | 3.65   | 0.52        | 0.6       | 0.59         | 0.22               | 0.33               |
| ss Atb             | 125  | NA                                                         | 0.0495 | 0.0495 | 0.0495 | 0.0495      | 0.0495    | 0.0495       | 0.0495             | 0.0495             |
| IPM 8              | 1.23 |                                                            | NA     | 0.0495 | 0.2752 | 0.0495      | 0.0495    | 0.011        | 0.0495             | 0.0495             |
| RFB 1              | 7.48 |                                                            |        | NA     | 0.1266 | 0.0495      | 0.0495    | 0.0495       | 0.0495             | 0.0495             |
| RFB 8              | 3.65 |                                                            |        |        | NA     | 0.0495      | 0.0495    | 0.0495       | 0.0495             | 0.0495             |
| IPM 8 RFB 1        | 0.52 |                                                            |        |        |        | NA          | 0.6579    | 0.5127       | 0.1266             | 0.2752             |
| IPM 8 RFB 8        | 0.6  |                                                            |        |        |        |             | NA        | 0.8273       | 0.0495             | 0.2752             |
| IPM 8 AVI          | 0.59 |                                                            |        |        |        |             |           | NA           | 0.2752             | 0.2752             |
| IPM 8 RFB 1 AVI 16 | 0.22 |                                                            |        |        |        |             |           |              | NA                 | 0.5127             |
| IPM 8 RFB 8 AVI 16 | 0.33 |                                                            |        |        |        |             |           |              |                    | NA                 |

Fold change in the number of intracellular bacteria after 72h of incubation in the presence of the drugs ( $\mu\text{g/ml}$ ) are indicated. NA, not applicable.
